# Supplementary material
Source: PubMed Central journal article supplement (PMC2504869)
Supplement: M801925200_1.pdf [file M801925200_1.pdf]

# Supplemental Figure 1

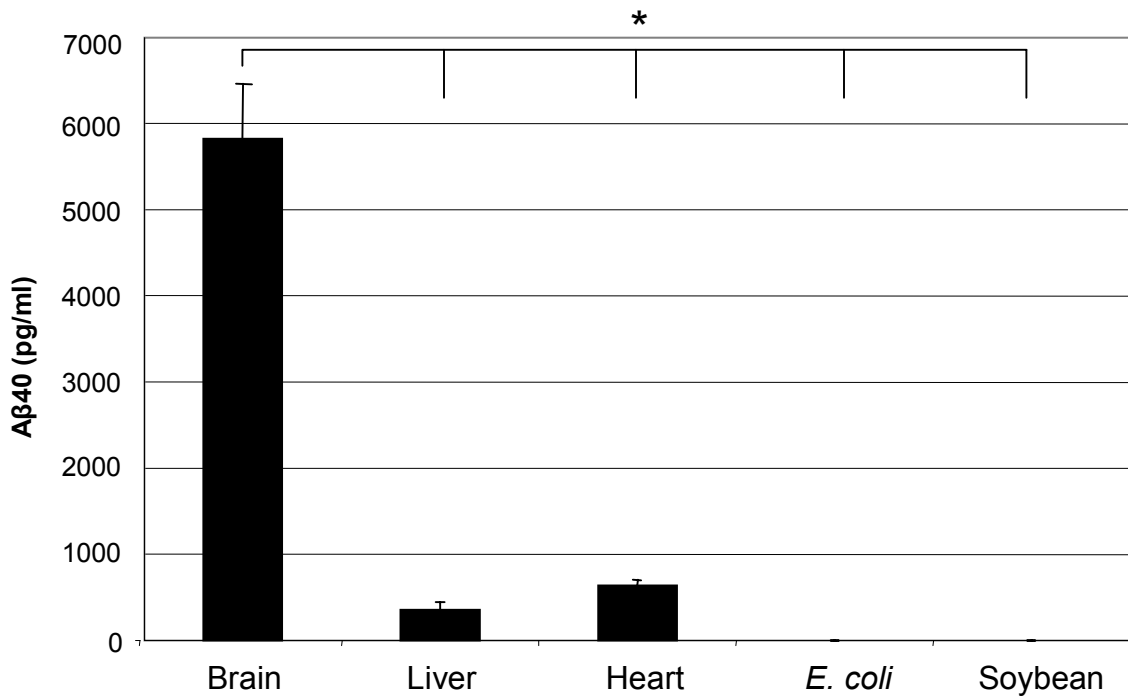

Effect of complex lipid extracts on the cleavage efficiency of the C100FLAG substrate. Complex lipid mixtures were used at a total lipid concentration of 1.25 mg/ml. Aβ40 production was measured by ELISA. Error bars represent standard errors of the mean. Data were statistically analyzed by One-way ANOVA with Tukey-Kramer post-testing. Statistical significance of  $p < 0.001$  (\*) is indicated.
